# Supplementary material
Source: PubMed Central journal article supplement (PMC4541102)
Supplement: DS_10.1177_0022034514542108.pdf [file DS_10.1177_0022034514542108.pdf]

Y.-Y. Hong<sup>1</sup>, F.-Y. Yu<sup>1</sup>, J.-F. Qu<sup>1</sup>, F. Chen<sup>2\*</sup>,  
and T.-J. Li<sup>1\*</sup>

<sup>1</sup>Department of Oral Pathology, Peking University School and Hospital of Stomatology, 22 Zhongguancun Avenue South, Haidian District, Beijing 100081, China; and <sup>2</sup>Central Laboratory, Peking University School and Hospital of Stomatology, 22 Zhongguancun Avenue South, Haidian District, Beijing 100081, China; \*corresponding authors, litiejun22@vip.sina.com, moleculcf@gmail.com

*J Dent Res* DOI: 10.1177/0022034514542108

# Fibroblasts Regulate Variable Aggressiveness of Syndromic Keratocystic and Non-syndromic Odontogenic Tumors

## APPENDIX

**Appendix Table 1.** Summary of Patient Information

| No.        | Gender | Age (yrs) | Type        | Clinical Manifestation                                                                                                  |
|------------|--------|-----------|-------------|-------------------------------------------------------------------------------------------------------------------------|
| Patient 1  | Female | 16        | Syndrom     | Multiple KCOTs, multiple skin naevi, calcification of falx cerebri, bifid rib                                           |
| Patient 2  | Female | 32        | Syndrom     | Multiple KCOTs, palmar/plantar pits, calcification of falx cerebri, bridged sella, frontal bossing, multiple skin naevi |
| Patient 3  | Female | 60        | Syndrom     | Multiple KCOTs, multiple skin naevi, calcification of falx cerebri, bifid rib, telecanthus                              |
| Patient 4  | Male   | 15        | Syndrom     | Multiple KCOTs, palmar/plantar pits, bifid rib, telecanthus, frontal bossing, cleft lip and palate                      |
| Patient 5  | Male   | 45        | Syndrom     | Multiple KCOTs, palmar/plantar pits, bifid rib, cleft lip and palate                                                    |
| Patient 6  | Female | 20        | Syndrom     | Multiple KCOTs, bifid rib, multiple skin naevi                                                                          |
| Patient 7  | Male   | 30        | Syndrom     | Multiple KCOTs, bifid rib, calcification of falx cerebri                                                                |
| Patient 8  | Male   | 17        | Syndrom     | Multiple KCOTs, bifid rib, calcification of falx cerebri                                                                |
| Patient 9  | Male   | 18        | Non-syndrom | Sporadic KCOT                                                                                                           |
| Patient 10 | Male   | 32        | Non-syndrom | Sporadic KCOT                                                                                                           |
| Patient 11 | Male   | 31        | Non-syndrom | Sporadic KCOT                                                                                                           |
| Patient 12 | Male   | 25        | Non-syndrom | Sporadic KCOT                                                                                                           |
| Patient 13 | Male   | 26        | Non-syndrom | Sporadic KCOT                                                                                                           |
| Patient 14 | Female | 59        | Non-syndrom | Sporadic KCOT                                                                                                           |
| Patient 15 | Female | 49        | Non-syndrom | Sporadic KCOT                                                                                                           |
| Patient 16 | Female | 56        | Non-syndrom | Sporadic KCOT                                                                                                           |

Ages were recorded at the time of surgery. The clinical manifestations were according to the history health check results from doctors.

**Appendix Table 2.** Primers for Gene Expression Assay

| Genes                         | Forward Primers (5'-3')   | Reverse Primers (5'-3')  |
|-------------------------------|---------------------------|--------------------------|
| GAPDH (RT-PCT)                | ATGCCAGTGAGCTTCCCGTTCAGC  | TGGTATCGTGGAAGGACTCATGAC |
| PPAR $\gamma$ 2 (RT-PCT)      | GGGGTGATGTGTTGAAGTTG      | CAGGAAAGACAACAGACAAATCA  |
| LPL (RT-PCT)                  | GAAGGAGTAGGTCTTATTTGTGGAA | GTGGCCGAGAGTGAGAACAT     |
| Runx2 (RT-PCR)                | CCGCACGACAACCGCACCAT      | CGCTCCGGCCCAAAATCTC      |
| OCN (RT-PCR)                  | CCCAAAGGCTTCTTCTTG        | CTGGTAGTTGTTGTGAGC       |
| GAPDH (Real-time PCR)         | ACAACCTTTGGTATCGTGGAAGG   | GCCATCACGCCACAGTTTC      |
| Runx2 (Real-time PCR)         | AGTGGACGAGGCAAGAGTTTCA    | GGGTTCCCGAGGTCCATCTA     |
| COL1A1 (Real-time PCR)        | AGACACTGGTGCTAAGGGAGAG    | GACCAGCAACACCATCTGCG     |
| OCN (Real-time PCR)           | CCTGAAAGCCGATGTGGT        | AGGGCAGCGAGGTAGTGA       |
| OPN (Real-time PCR)           | GGCCGAGGTGATAGTGTGGTT     | CTCCTCGCTTCCATGTGTGA     |
| IL-1 $\alpha$ (Real-time PCR) | AGATGGCCAAAGTTCCTGAC      | CCCAGTATGAGTGGCATAA      |
| Cox2 (Real-time PCR)          | CCAGTATAAGTGCGATTGTACCC   | TCAAAAATCCGGTGTGAGCA     |
| RANKL (Real-time PCR)         | AGATCGCTCCTCCATGTACCA     | GCCTTGCCTGTATCACAACCT    |
| OPG (Real-time PCR)           | CCTCCAAGCCCCTGAAGGTT      | CCTGGGTGGTCCACTTAATGG    |

**Appendix Table 3.** mRNA Expression Levels of Osteoblast-specific Genes

| Genes  | Day 3 (NS-KCOT vs. S-KCOT)                      | Day 7 (NS-KCOT vs. S-KCOT)                      |
|--------|-------------------------------------------------|-------------------------------------------------|
| Runx2  | 2.33-fold (1.43 $\pm$ 0.40 vs. 0.61 $\pm$ 0.13) | 1.42-fold (1.32 $\pm$ 0.13 vs. 0.93 $\pm$ 0.15) |
| COL1A1 | 3.11-fold (1.76 $\pm$ 0.47 vs. 0.57 $\pm$ 0.22) | 2.72-fold (2.08 $\pm$ 0.13 vs. 0.77 $\pm$ 0.49) |
| OCN    | 5.99-fold (2.86 $\pm$ 3.03 vs. 0.48 $\pm$ 0.21) | 4.92-fold (4.97 $\pm$ 5.10 vs. 1.01 $\pm$ 0.19) |
| OPN    | 3.76-fold (1.49 $\pm$ 0.54 vs. 0.40 $\pm$ 0.20) | 8.47-fold (6.42 $\pm$ 4.96 vs. 0.76 $\pm$ 0.32) |
